# Supplementary material for: Role of HGF in epithelial–stromal cell interactions during progression from benign breast disease to ductal carcinoma in situ
Source: PubMed Central journal article supplement (PMC3978616; doi:10.1186/bcr3476), 2013-09-12

Supplemental Figure 1

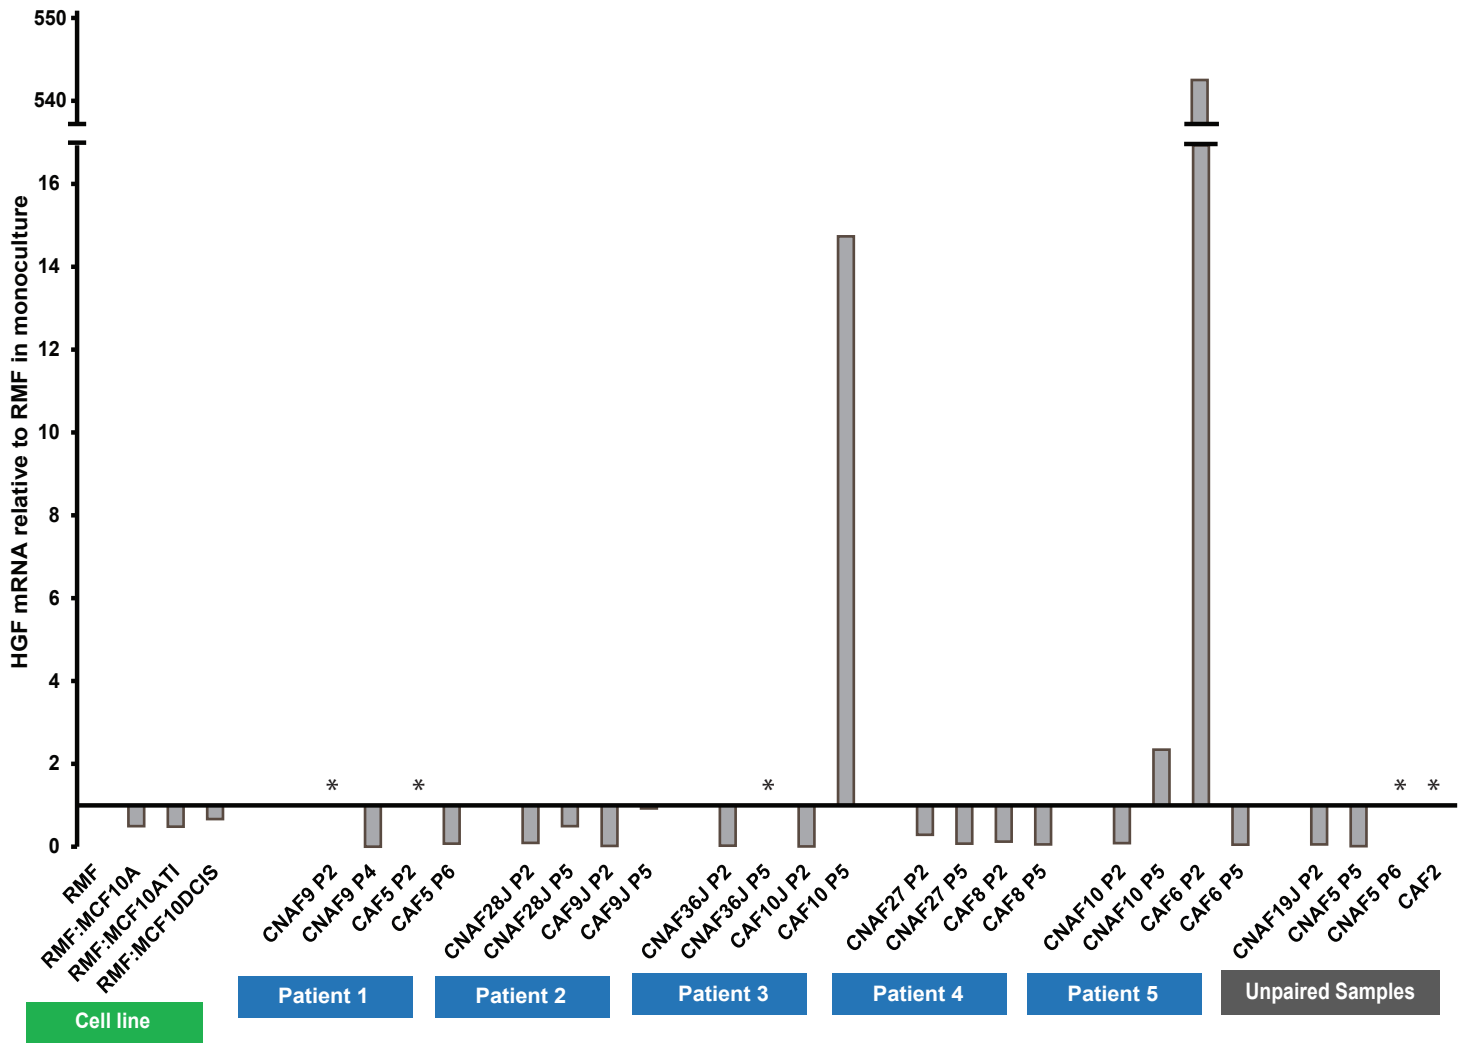

Supplement: bcr3476-S1.pdf [file bcr3476-S1.pdf]
