# Supplementary material for: Role of HGF in epithelial–stromal cell interactions during progression from benign breast disease to ductal carcinoma in situ
Source: PubMed Central journal article supplement (PMC3978616; doi:10.1186/bcr3476), 2013-09-12
Supplement: bcr3476-S3.pdf [file bcr3476-S3.pdf]

Supplemental Table 2

|                 | MCF10A:RMFs | MCF10AT1:RMFs | MCF10DCIS:RMFs |
|-----------------|-------------|---------------|----------------|
| CKbeta8-1       | -           | -             | 1.57           |
| MIP-3alpha      | -           | -             | 1.63           |
| il-4            | -           | -             | 1.65           |
| Eotaxin         | -           | -             | 1.66           |
| TARC            | -           | -             | 1.68           |
| Il-3            | -           | -             | 1.7            |
| FGF-4           | -           | -             | 1.71           |
| RANTES          | 3.13        | 2.32          | 1.8            |
| BDNF            | -           | -             | 1.83           |
| IGFBP-1         | -           | -             | 1.85           |
| FGF-9           | -           | -             | 1.86           |
| NAP-2           | -           | -             | 1.86           |
| IL-13           | -           | -             | 1.95           |
| Thrombopoetin   | -           | -             | 1.98           |
| GDNF            | -           | -             | 2              |
| leptin          | -           | -             | 2.01           |
| BLC             | -           | -             | 2.02           |
| Osteopontin     | -           | -             | 2.03           |
| MDC             | -           | -             | 2.04           |
| Eotaxin-3       | -           | -             | 2.05           |
| MIP-1delta      | -           | -             | 2.06           |
| PlGF            | -           | -             | 2.08           |
| Fractalkine     | -           | -             | 2.09           |
| SCF             | -           | -             | 2.11           |
| Eotaxin-2       | -           | -             | 2.16           |
| SDF-1           | -           | -             | 2.17           |
| FGF-7           | -           | -             | 2.19           |
| IGFBP-4         | -           | -             | 2.25           |
| Il-1B           | -           | -             | 2.26           |
| TNF-alpha       | -           | -             | 2.28           |
| GM-CSF          | -           | -             | 2.3            |
| LIF             | -           | -             | 2.32           |
| Fit-3 ligand    | -           | -             | 2.33           |
| MCSF            | -           | -             | 2.33           |
| MIF             | -           | -             | 2.35           |
| NT-3            | -           | -             | 2.35           |
| IGF-1           | -           | -             | 2.35           |
| IL-16           | -           | -             | 2.37           |
| IGFBP-3         | -           | -             | 2.39           |
| PARC            | -           | -             | 2.39           |
| il-10           | -           | -             | 2.4            |
| TGF-beta3       | -           | -             | 2.42           |
| NT-4            | -           | -             | 2.48           |
| LIGHT           | -           | -             | 2.5            |
| il-5            | -           | -             | 2.51           |
| MCP-4           | -           | -             | 2.55           |
| il-7            | -           | -             | 2.66           |
| I-309           | -           | -             | 2.66           |
| TNF-beta        | -           | -             | 2.82           |
| MIG             | -           | -             | 3.21           |
| GCSF            | -           | -             | 3.59           |
| Il-6            | -           | 6.02          | 3.67           |
| MCP-2           | -           | -             | 3.72           |
| Il-2            | -           | -             | 3.8            |
| FGF-6           | -           | 1.56          | 5.04           |
| GCP-2           | -           | 3.18          | 5.58           |
| MCP-3           | -           | 2.5           | 6.09           |
| Osteoprotegerin | -           | -             | 6.21           |
| ENA-78          | -           | 2.37          | 6.24           |
| MCP-1           | -           | 7.98          | 7.57           |
| Oncostatin M    | -           | -             | 11.14          |
| HGF             | -           | 70.12         | 80.65          |
