# Supplementary material for: Role of HGF in epithelial–stromal cell interactions during progression from benign breast disease to ductal carcinoma in situ
Source: PubMed Central journal article supplement (PMC3978616; doi:10.1186/bcr3476), 2013-09-12
Supplement: bcr3476-S8.pdf [file bcr3476-S8.pdf]

Supplemental Table 4

|                         | <b>MCF10A:RMF</b> | <b>MCF10DCIS:RMF</b> | <b>MCF10DCIS:RMF<br/>+antiHGF</b> | <b>P-value</b> |
|-------------------------|-------------------|----------------------|-----------------------------------|----------------|
| <b>Lumen</b>            |                   |                      |                                   |                |
| Yes                     | 13                | 27                   | 16                                | 0.0007         |
| No                      | 18                | 5                    | 11                                |                |
| Undetermined            | -                 | -                    | 3                                 |                |
| <b>Apoptotic bodies</b> |                   |                      |                                   |                |
| Yes                     | 8                 | 2                    | 8                                 | 0.045          |
| No                      | 19                | 30                   | 20                                |                |
| Undetermined            | 3                 | -                    | 2                                 |                |
| <b>Total (n)</b>        | 31                | 32                   | 30                                |                |
